# Supplementary material for: Crystal Structure Prediction and Lattice Dynamical Calculations for the Rare Platinum-Group Mineral Zaccariniite (RhNiAs)
Source: MDPI journal article supplement (doi:10.3390/min12010098), 2022-01-15
Supplement: s1 [file s1]

Supplementary Material for

**Crystal Structure Prediction and Lattice Dynamical Calculations for the  
Rare Platinum-Group Mineral Zaccariniite (RhNiAs)**

Jordi Ibáñez-Insa

Geosciences Barcelona (GEO3BCN), Consell Superior d'Investigacions Científiques  
(CSIC), c/ Lluís Solé i Sabarís s/n, 08028 Barcelona, Catalonia, Spain;  
jibanez@geo3bcn.csic.es

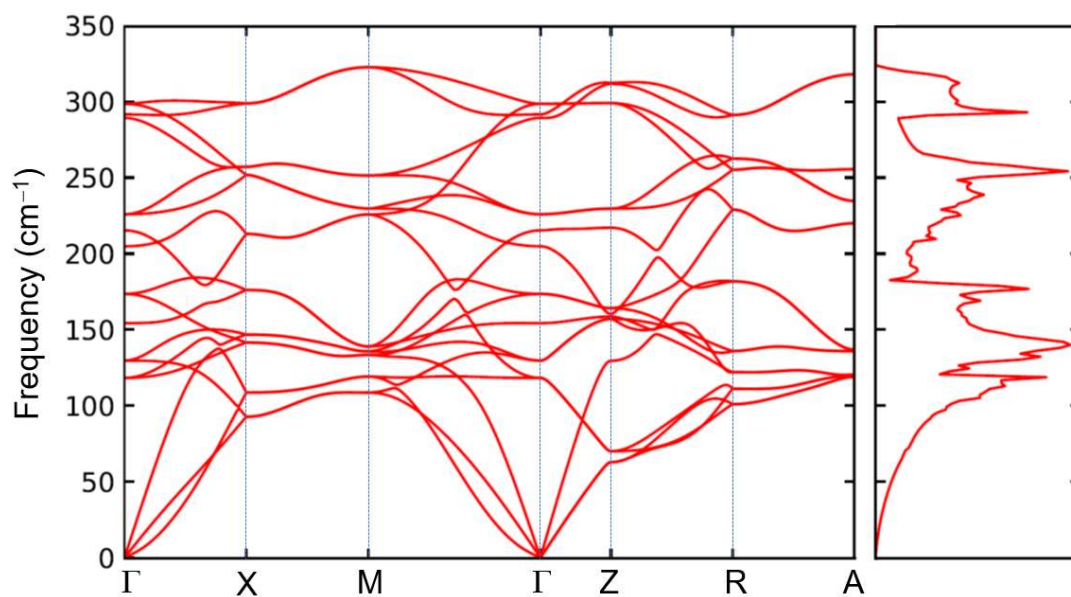

**Figure S1.** Calculated phonon band structure of RhNiAs using the finite displacement (FD) method with GGA-PBE parametrization and including van der Waals corrections (Grimme's D2). The right panel shows the corresponding phonon density of states (PDOS).
